# Supplementary material
Source: Springer Nature journal article supplement (https://www.springermedizin.de/resource/supplementary/13012_2013_771_MOESM1_ESM.pdf/9630642)

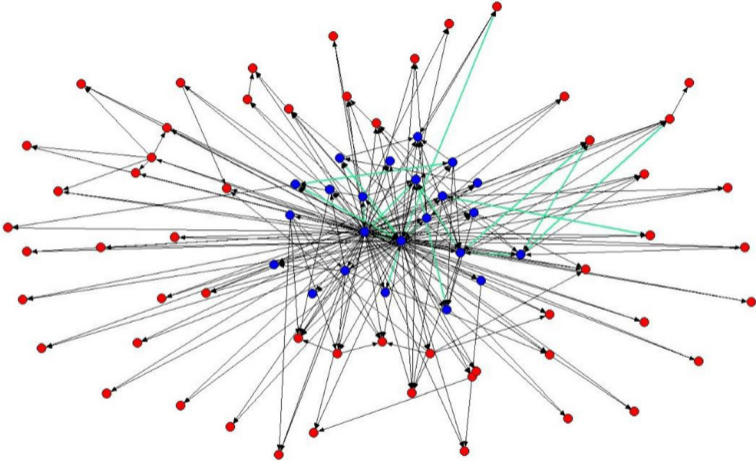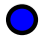

*Members of the core*

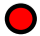

*Members of the periphery*

Supplement: MOESM1 [file 9630642]
